# Supplementary material for: An unusual and physiologically vital protein with guanylate cyclase and P-type ATPase like domain in a pathogenic protist
Source: bioRxiv or medRxiv preprint supplement (doi:10.1101/475848), 2018-11-23

## Supplementary information

**Figure S1. Phylogenetic analysis reveals a protozoan-specific clading of *TgATPase<sub>p</sub>*-GC.** The phylogenetic tree shows the evolutionary relationship of *TgATPase<sub>p</sub>*-GC from *T. gondii* with respective orthologs from various organisms representing the indicated domains of life. The image represents a single most parsimonious phylogenetic tree generated by UPGMA method. Sequence alignment and construction of the tree were performed by CLC Sequence Viewer 7.7 followed by visualization using Figtree v1.4.3 program. The colored dots on branching nodes show the bootstrap values for individual branches. Accession numbers: *Arabidopsis thaliana*, AAM51559.1; *Ascaris suum* (receptor-type), ERG86823.1; *Bos taurus* (retinal-type) NP\_776973.2; *Bos taurus* (soluble  $\alpha$ 1-subunit), P19687.1; *Bos taurus* (soluble  $\beta$ 1-subunit), P16068.1; *Caenorhabditis elegans* (receptor-type), NP\_494995.2; *Caenorhabditis elegans* (soluble), NP\_510557.3; *Drosophila melanogaster* (receptor-type), AAA85858.1; *Drosophila melanogaster* (soluble  $\beta$ -subunit), NP\_524603.2; *Eimeria tenella* (soluble  $\alpha$ ), XP\_013229212.1; *Eimeria tenella* (particulate  $\beta$ ), XP\_013235760.1; *Hammondia hammondi*, XP\_008885058.1; *Homo sapiens* (retinal-type), NP\_000171.1; *Homo sapiens* (soluble  $\alpha$ 1-subunit), NP\_001124157.1; *Homo sapiens* (soluble  $\beta$ 1-subunit), NP\_001278880.1; *Musca domestica* (receptor-type), XP\_005177218.1; *Musca domestica* (soluble), XP\_019895151.1; *Mus musculus* (retinal-type), NP\_001007577.1; *Mus musculus* (soluble  $\alpha$ 1-subunit), AAG17446.1; *Mus musculus* (soluble  $\beta$ 1-subunit), AAG17447.1; *Oryza sativa*, ABD18448.1; *Oxytricha trifallax*, EJY85073.1; *Paramecium tetraurelia*, XP\_001346995.1; *Plasmodium falciparum* (soluble  $\alpha$ ), AJ245435.1; *Plasmodium falciparum* (particulate  $\beta$ ), AJ249165.1; *Prunus persica*, AGN29346.1; *Tetrahymena pyriformis*, AJ238858.1; *Toxoplasma gondii*, EPR59074.1; *Toxocara canis* (receptor-type), KHN81453.1; *Toxocara canis* (soluble), KHN85312.1.

**Figure S2. Sequence alignment of GC1 and GC2 domains of *TgATPase<sub>p</sub>*-GC with other exemplary cyclases identifies signature residues.** Amino acid sequences were aligned with the Clustal Omega program. The color-coding refers to at least 30% sequence conservation. The secondary structures depicted underneath the alignment correspond to transmembrane type III adenylate cyclases (tmACs) (*Oryctolagus cuniculus* for GC1, *Rattus norvegicus* for GC2; DSSP analysis). In type III cyclases, 7 key residues are involved in cofactor binding for catalysis, which are indicated above the alignments as ‘Me’ for metal, ‘B’ for base, ‘P $\gamma$ ’ for phosphate, ‘R’ for ribose, and ‘Tr’ for transition state binding. Note that alignment of GC1 and GC2 domains from *TgATPase<sub>p</sub>*-GC to their orthologous GCs/ACs showed that unlike other cyclases, a 74-residues long segment (3033-3107 aa) is inserted between  $\alpha$ 3 and  $\beta$ 4 of GC1 (not shown). Accession numbers: *TgATPase<sub>p</sub>*-GC, *Toxoplasma gondii* (Uniprot S7VVK4); PfGC $\alpha$ , *Plasmodium falciparum* (AJ245435.1); PfGC $\beta$ , *P. falciparum* (AJ249165.1); PtGC, *Paramecium tetraurelia* (XP\_001346995.1); TpGC, *Tetrahymena pyriformis* (AJ238858.1); soluble MmGC $\alpha$ , *Mus musculus* (AAG17446.1); soluble MmGC $\beta$ , *M. musculus* (AAG17447.1); retinal-type MmGC2, *M. musculus* (NP\_001007577.1); type II RntmAC, *Rattus norvegicus* (P26769.1) and; type V OctmAC, *Oryctolagus cuniculus* (CAA82562.1).

**Figure S3. Recombinant expression of *TgATPase<sub>p</sub>*-GC1 and GC2 domains in M15 and BTH101 strains of *Escherichia coli*.** (A) Schematics depicting the molecular cloning of GC1, GC2 and GC1+GC2 domains in the *pQE60* expression vector. The open reading frames of indicated domains were amplified starting from the first upstream start codon (ATG) using tachyzoite-derived RNA and ligated into *Bgl*III-digested *pQE60* plasmid. Proteins were fused with a C-terminal 6xHis-tag for subsequent detection by immunoblot and purification by virtue of the Ni-NTA column. (B) Immunoblot of purified GC1-6xHis and GC2-6xHis proteins (5  $\mu$ g) using  $\alpha$ -His antibody. Purification was performed under denaturing conditions from the M15 strain, as described in *methods*. Purification of GC1+GC2 was not successful. The protein bands of 44-kDa and 34-kDa correspond to GC1 and GC2 domains, respectively. (C) Functional testing of GC1, GC2 and GC1+GC2 by complementation

of the BTH101 strain were deficient in cAMP signaling. The transgenic strains expressing GC1, GC2, GC1+GC2, *EcCyaA* (positive control), or harboring the empty *pQE60* vector (negative control) were grown in LB medium (OD<sub>600</sub>,1.6; 30°C), and then dilution plated on MacConkey agar containing 1% maltose (carbon source) and 200 μM IPTG (inducer). The appearance of red colonies indicates a cAMP-dependent catabolism of disaccharide following a functional expression of *EcCyaA*, but not others.

**Figure S4. Pharmacological inhibition of phosphodiesterases can repair phenotypic defects in the *TgATPase<sub>P</sub>*-GC mutant.** (A) Gliding motility of the mutant ( $P_{\text{native-}TgATPaseP-GC-HA_3'IT-3'UTR_{\text{excised}}}$ ) and progenitor ( $P_{\text{native-}TgATPaseP-GC-HA_3'IT-3'UTR_{\text{floxed}}}$ ) strains in the presence of two inhibitors of cGMP-specific phosphodiesterases, zaprinast (500 μM) and BIPPO (55 μM). Fresh syringe-released parasites were treated with drugs for 15 min during the motility assay, followed by fixation and staining with  $\alpha$ -*TgSag1* antibody. 500-600 parasites of each strain were evaluated for the motile fraction, and 100-120 trail lengths were measured by ImageJ (n= 3 assays). (B-C) Egress and invasion rates of indicated parasite strains after exposure to zaprinast and BIPPO. Intracellular and extracellular parasites were differentially stained with  $\alpha$ -*TgGap45* and  $\alpha$ -*TgSag1* antibodies, as shown in *methods*. Drug treatment was performed during invasion assay for 1 h. For egress, parasitized cells (MOI, 1; 40 h post-infection) were stimulated with either zaprinast (500 μM) or BIPPO (55 μM) for 5:30 min prior to fixation and staining. In total, 1000 parasites and 500-600 vacuoles were scored for each strain in *panel b* and *c*, respectively (n= 3 assays). Numerical values in all graphs show the means with S.E.M. Statistics was done for individual pair of columns using Student's *t*-test (\*,  $p \leq 0.05$ ; \*\*,  $p \leq 0.01$ ; \*\*\*,  $p \leq 0.001$ ).

**Figure S5. C-terminal epitope-tagging and Cre recombinase-mediated knockdown of *TgPKG* in *T. gondii*.** (A) 3'-insertional tagging of the *TgPKG* gene with a hemagglutinin tag (step 1) and subsequent deletion of loxP-flanked 3'UTR by Cre recombinase (step 2). The construct for 3'-insertional tagging (3'IT) *via* indicated crossover sequence (COS) was transformed into the parental strain (RH $\Delta ku80$ -*hxgprt*) and drug-selected for introduction of HXGPRT selection cassette (S.C.). The eventual strain (termed as progenitor,  $P_{\text{native-}TgPKG-HA_3'IT-3'UTR_{\text{floxed}}}$ ) expressed *TgPKG*- $HA_3'IT$  under its own regulatory elements. In the second step, the progenitor strain was transfected with a vector expressing Cre-recombinase to excise the floxed 3'UTR and HXGPRT *via* negative selection, resulting in downregulation of *TgPKG* expression. (B) Genomic screening PCR validating the integrity of the *TgPKG* mutant generated by excision of 3'UTR. Primers indicated as red-color arrows in *panel a* were used to test gDNAs isolated from the mutant clones (C1-C3) and progenitor strain. A successful mutagenesis was further confirmed by sequencing of amplicons (1.9-kb). (C) Immunoblot showing the expression level of *TgPKG* in two selected mutant clones along with the progenitor and parental strains. Extracellular tachyzoites ( $2 \times 10^7$ ) of each strain were subjected to protein isolation followed by immunoblotting with  $\alpha$ -HA plus  $\alpha$ -*TgRop2* (loading control) antibodies. The presence of two *TgPKG* isoforms (112-kDa and 135-kDa) in the progenitor, but not in the parental strain, confirms an efficient 3'-HA tagging (see *panel a*).

**Figure S6. Inhibition of residual activity in the *TgPKG*- $HA_3'IT$  mutant by compound 2 aggravates the motility defect.** The motile fraction and the average trail length of the mutant ( $P_{\text{native-}TgPKG-HA_3'IT-3'UTR_{\text{excised}}}$ ) and progenitor ( $P_{\text{native-}TgPKG-HA_3'IT-3'UTR_{\text{floxed}}}$ ) strains, generated according to Figure S5, were measured by staining with  $\alpha$ -*TgSag1* antibody after compound 2 treatment (2 μM, 15 min). A total of 500 parasites for each strain were analyzed to calculate the motile fraction. In total, 100 trails were measured for the progenitor strain, whereas only 30 trails could be evaluated for the mutant due to severe defect. Numerical values show the means with S.E.M. Statistical significance was calculated for each pair of column individually by Student's *t*-test. (\*,  $p \leq 0.05$ ; \*\*,  $p \leq 0.01$ ; \*\*\*,  $p \leq 0.001$ ).

**Table S1. Oligonucleotide sequences used in this study**

| <b>Primer name<br/>(Restriction site)</b>                                                        | <b>Primer Sequence<br/>(Restriction site underlined)</b>                              | <b>Objective<br/>(Cloning vector)</b>                                                                                     |
|--------------------------------------------------------------------------------------------------|---------------------------------------------------------------------------------------|---------------------------------------------------------------------------------------------------------------------------|
| <i>TgATPase<sub>p</sub></i> -GC-COS-F1 ( <i>Xcm</i> I)                                           | CTCATCC <u>ACCGGTCACCTGGGC</u><br>ATGAGTGTGGCGGAGT                                    | Cloning of crossover sequence for 3'-HA tagging ( <i>p3'IT-HXGPRT</i> )                                                   |
| <i>TgATPase<sub>p</sub></i> -GC-HA <sub>3</sub> <sup>IT</sup> -COS-R1 ( <i>Eco</i> RI)           | CTCATCGAATTCCTACGCGTAGT<br>CCGGGACGTCGTACGGGTACGAC<br>CCGAGTGCAGAGC                   |                                                                                                                           |
| <i>TgPKG</i> -COS-F1 ( <i>Nco</i> I)                                                             | CTCATCCCATGGGAAA <u>ACTCGTT</u><br>TTCCCGC                                            |                                                                                                                           |
| <i>TgPKG</i> -HA <sub>3</sub> <sup>IT</sup> -COS-R1 ( <i>Eco</i> RI)                             | CTCATCGAATTCCTACGCGTAGT<br>CCGGGACGTCGTACGGGTAGAAA<br>TCCTTGTCCCAGTCATACT             |                                                                                                                           |
| <i>TgATPase<sub>p</sub></i> -GC-3'UTR-F1 ( <i>Eco</i> RI+ <i>lox</i> P)                          | CTCATCGAATTCATAACTTCGTAT<br>AGCATA <u>CATTATACGAAGTTATA</u><br>ACGCAGCTTTTGTTCAGC     | Cloning of 3'UTR for the native expression ( <i>p3'IT-HXGPRT</i> )                                                        |
| <i>TgATPase<sub>p</sub></i> -GC-3'UTR-R1 ( <i>Spe</i> I)                                         | CTCATCACTAGTTTATGTACGTAT<br>ATACGCACATGTATG                                           |                                                                                                                           |
| <i>TgPKG</i> -3'UTR-F1 ( <i>Eco</i> RI+ <i>lox</i> P)                                            | CTCATCGAATTCATAACTTCGTAT<br>AGCATA <u>CATTATACGAAGTTATT</u><br>TTTTCAGCTTAGGTGTTTGTTC |                                                                                                                           |
| <i>TgPKG</i> -3'UTR-R1 ( <i>Spe</i> I)                                                           | CTCATCACTAGTGCTTTTCTGCG<br>ACTCTGCTC                                                  |                                                                                                                           |
| <i>TgATPase<sub>p</sub></i> -GC-HA <sub>3</sub> <sup>IT</sup> -Scr-F1                            | CTGGTCTCCGCAGAGATGCT                                                                  | Screening primers of 3'UTR excision for the gene knockdown ( <i>p3'IT-HXGPRT</i> )                                        |
| Scr- <i>TgPKG</i> -HA <sub>3</sub> <sup>IT</sup> -Scr-F1                                         | GTTTCATGTGCGGACCTCTCC                                                                 |                                                                                                                           |
| 3'UTR <sub>excised</sub> - <i>lox</i> P-Scr-R1 ( <i>TgATPase<sub>p</sub></i> -GC/ <i>TgPKG</i> ) | CAGTGAGCGCAACGCAATTA                                                                  |                                                                                                                           |
| <i>TgATPase<sub>p</sub></i> -GC-CyCc1-F1 ( <i>Bgl</i> II)                                        | CTCATCAGATCTATGCTCGATAA<br>GAAGTACTTGCCCCAC                                           | Cloning of <i>TgATPase<sub>p</sub></i> -GC cyclase catalytic domains for <i>E. coli</i> expression ( <i>pQE60-6xHis</i> ) |
| <i>TgATPase<sub>p</sub></i> -GC-CyCc1-R1 ( <i>Bgl</i> II)                                        | CTCATCAGATCTCGACGACGCAC<br>CCGCAGT                                                    |                                                                                                                           |
| <i>TgATPase<sub>p</sub></i> -GC-CyCc2-F1 ( <i>Bgl</i> II)                                        | CTCATCAGATCTATGACGATGAG<br>CTTAACGTTTCATCATC                                          |                                                                                                                           |
| <i>TgATPase<sub>p</sub></i> -GC-CyCc2-R1 ( <i>Bgl</i> II)                                        | CTCATCAGATCTTTGAGGGATCG<br>CACCGCC                                                    |                                                                                                                           |
| <i>TgATPase<sub>p</sub></i> -GC-CyCc1+2-F1 ( <i>Bgl</i> II)                                      | CTCATCAGATCTATGCTCGATAA<br>GAAGTACTTGCCCCAC                                           |                                                                                                                           |
| <i>TgATPase<sub>p</sub></i> -GC-CyCc1+2-R1 ( <i>Bgl</i> II)                                      | CTCATCAGATCTTTGAGGGATCG<br>CACCGCC                                                    |                                                                                                                           |
| <i>TgATPase<sub>p</sub></i> -GC-KO-5'UTR-F1 ( <i>Xcm</i> I)                                      | CTCATCCACCGGTCACCTGGTG<br>CTTGGCTGATTGATGG                                            | Cloning of 5'UTR for the <i>TgATPase<sub>p</sub></i> -GC knockout ( <i>pKO-DHFR-TS</i> )                                  |
| <i>TgATPase<sub>p</sub></i> -GC-KO-5'UTR-R1 ( <i>Spe</i> I)                                      | CTCATCACTAGTTTTCGTTCGTATT<br>CGATAGCTCC                                               |                                                                                                                           |
| <i>TgATPase<sub>p</sub></i> -GC-KO-5'Scr-F1                                                      | CGAGACGAGATTCTTGAACGA                                                                 | Screening of 5' recombination                                                                                             |

|                                                                   |                                              |                                                                                                                   |
|-------------------------------------------------------------------|----------------------------------------------|-------------------------------------------------------------------------------------------------------------------|
| <i>TgATPase<sub>p</sub></i> -GC-KO-3'UTR-F1<br>( <i>Hind</i> III) | CTCATCAAGCTT <u>AA</u> CGCAGCTTT<br>TGTCAGCG | Cloning of<br>3'UTR for the<br><i>TgATPase<sub>p</sub></i> -GC<br>knockout ( <i>pKO-</i><br><i>DHFR-TS</i> )      |
| <i>TgATPase<sub>p</sub></i> -GC-KO-3'UTR-R1<br>( <i>Apa</i> I)    | CTCATCGGGCCC <u>GACGGCTAGTC</u><br>GAGACCCTG |                                                                                                                   |
| <i>TgATPase<sub>p</sub></i> -GC-KO-3'Scr-R1                       | AAGGATGATATTGCACCTCACA                       | Screening of 3'<br>recombination                                                                                  |
| <i>TgATPase<sub>p</sub></i> -GC-sgRNA-F1                          | AAGTTCGTTGACTCTGTTCCACCG<br>CCG              | Cloning of<br>sgRNA- for<br>editing of<br><i>TgATPase<sub>p</sub></i> -GC<br>( <i>pU6-sgRNA-</i><br><i>Cas9</i> ) |
| <i>TgATPase<sub>p</sub></i> -GC-sgRNA-R1                          | AAAACGGCGGTGAACAGAGTCA<br>ACGA               |                                                                                                                   |

# Figure S1

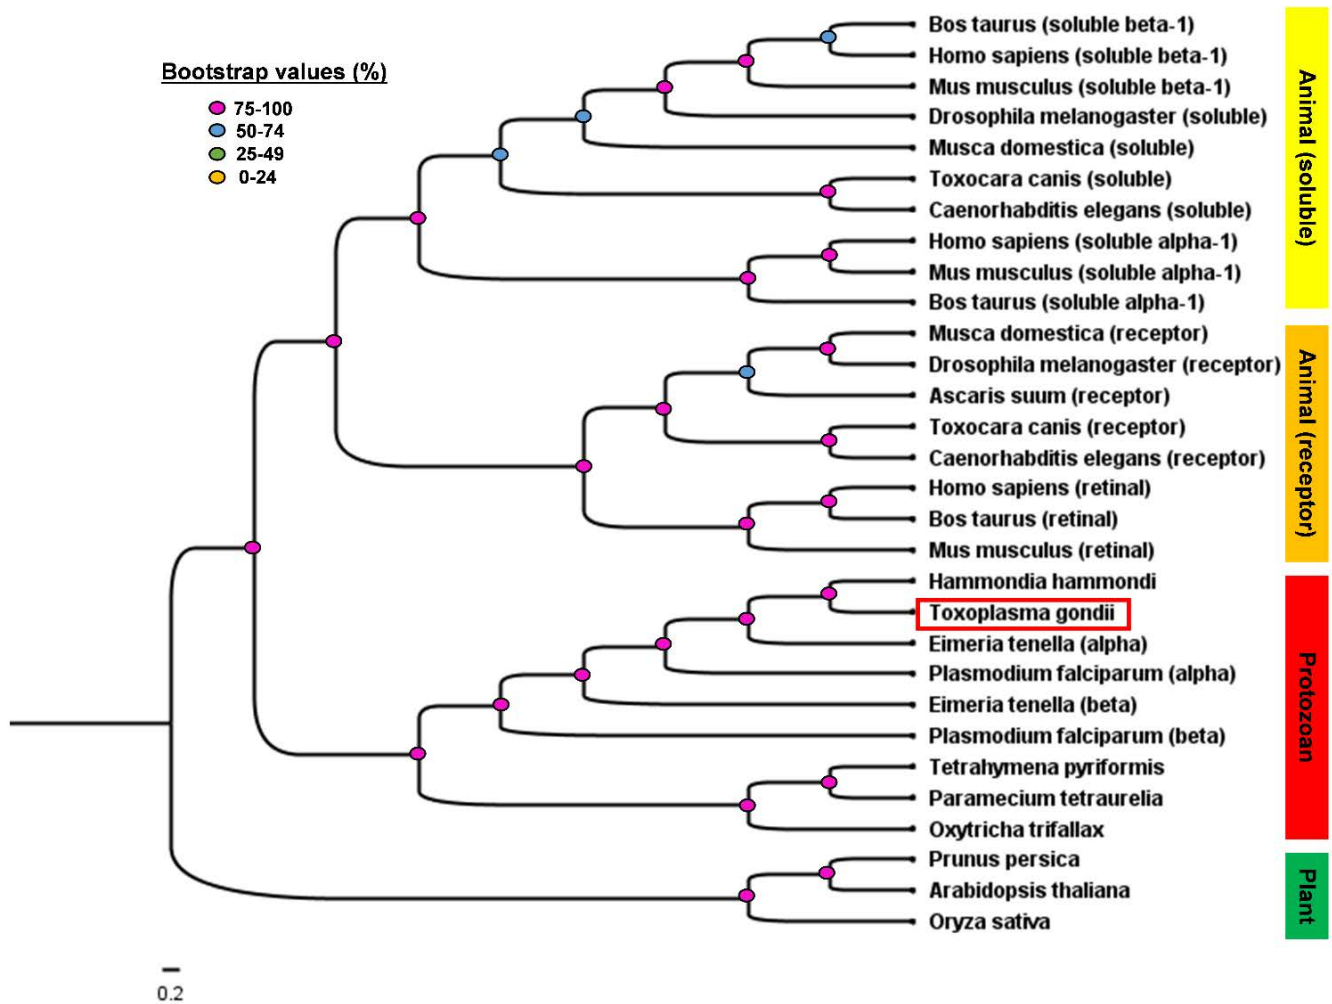

Figure S2

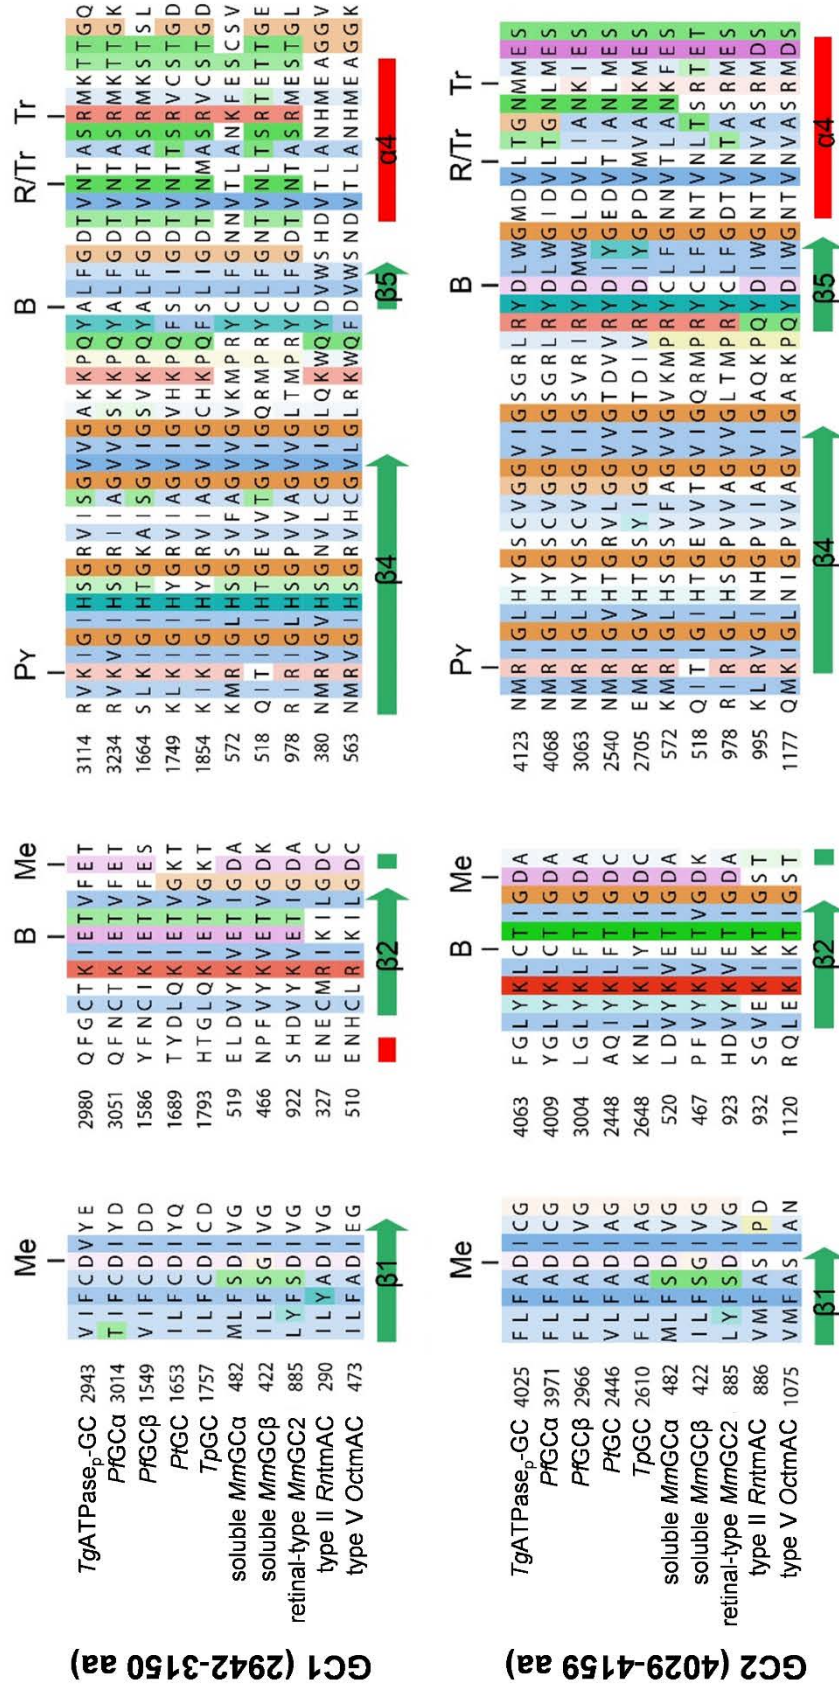

Figure S3

(A)

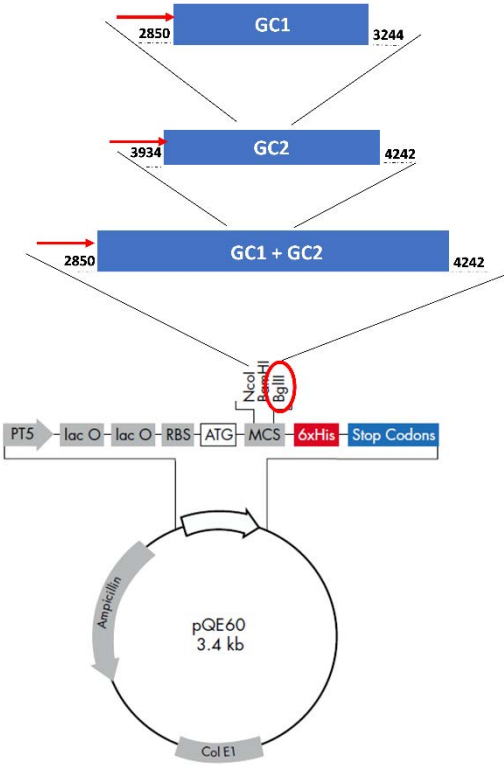

(B)

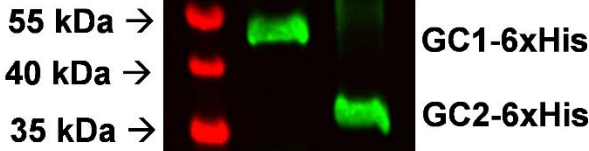

(C)

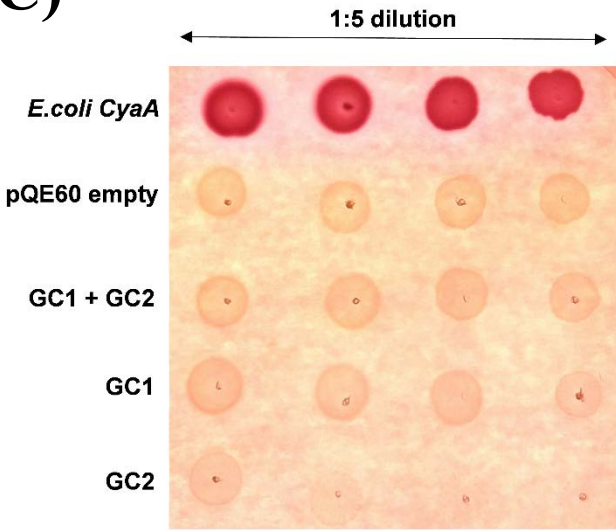

# Figure S4

(A)

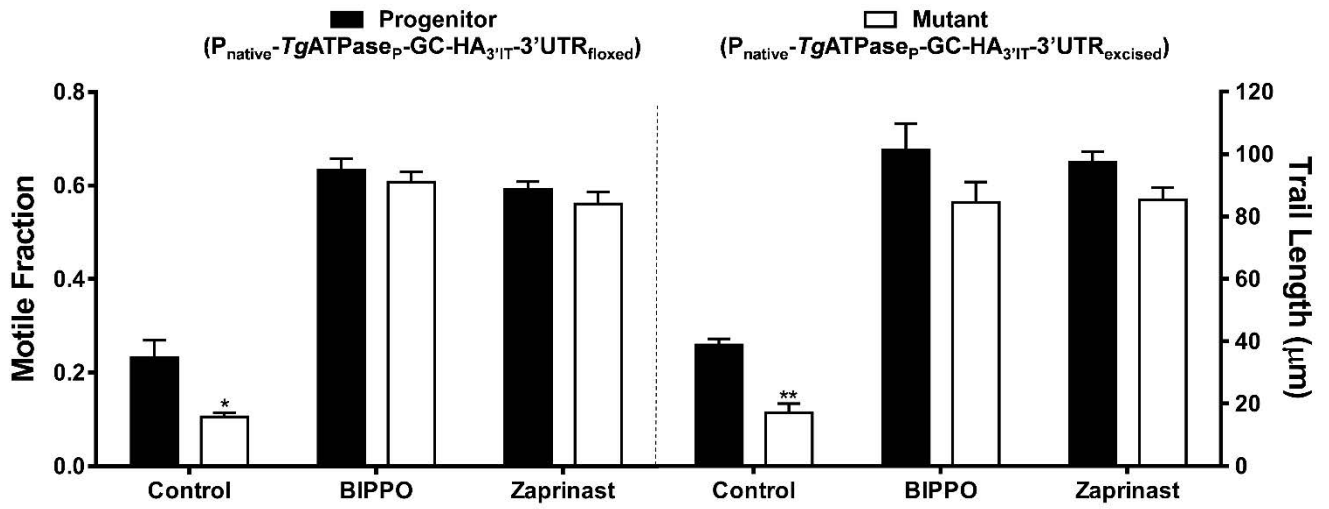

(B)

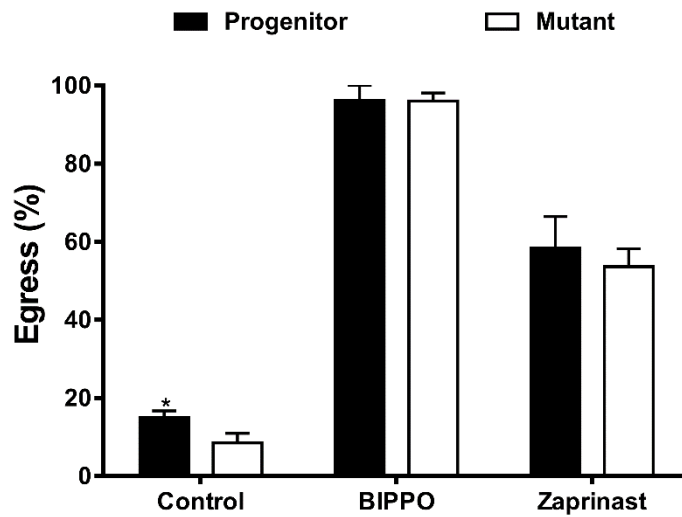

(C)

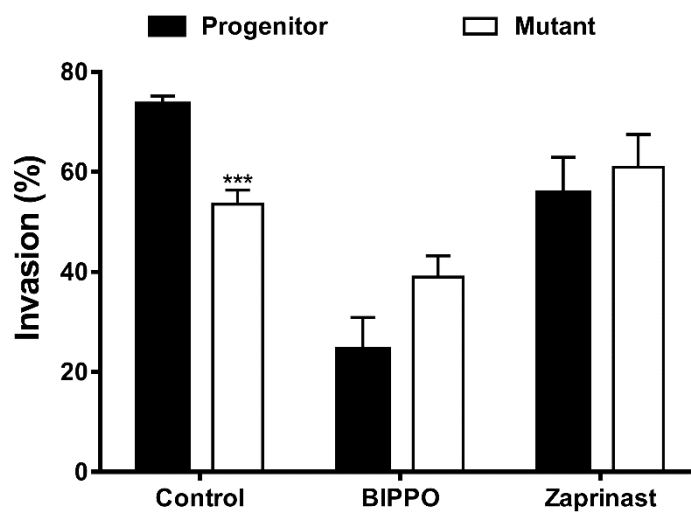



# Figure S5

(A)

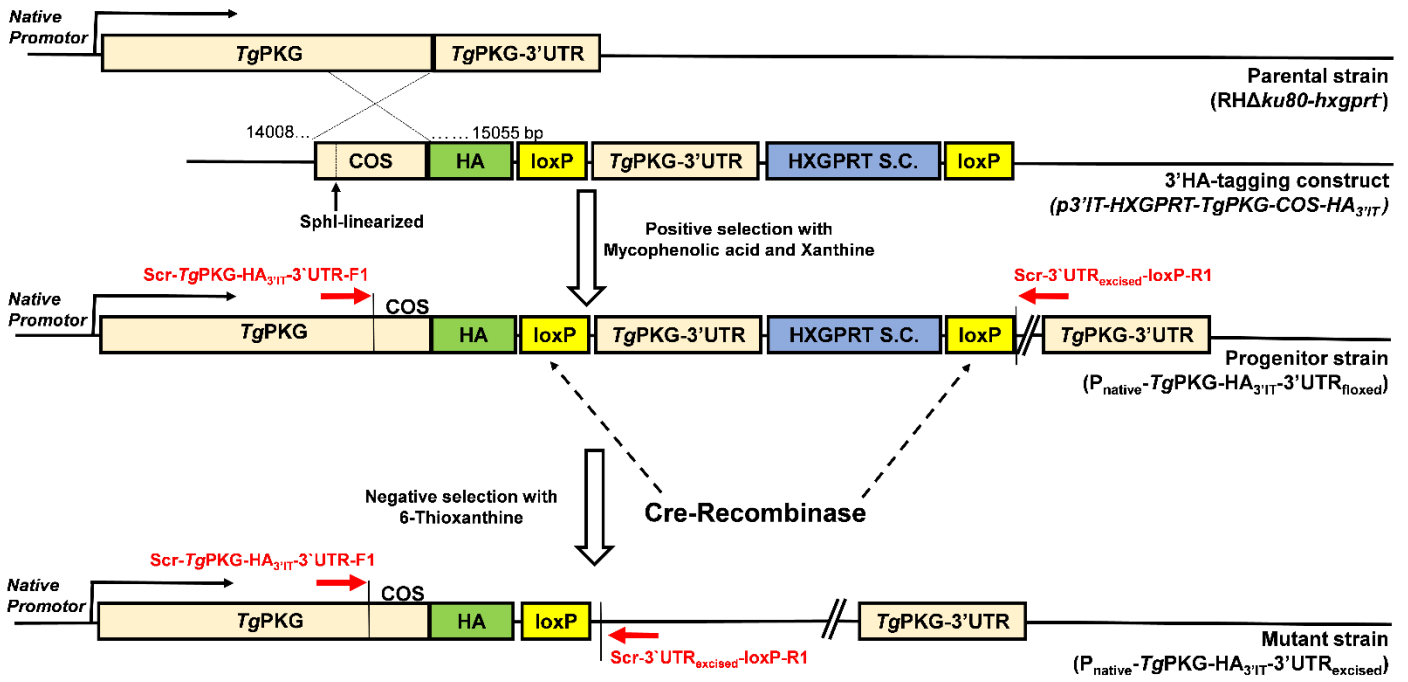

(B)

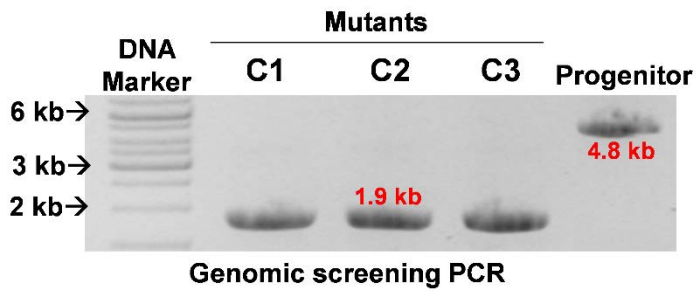

(C)

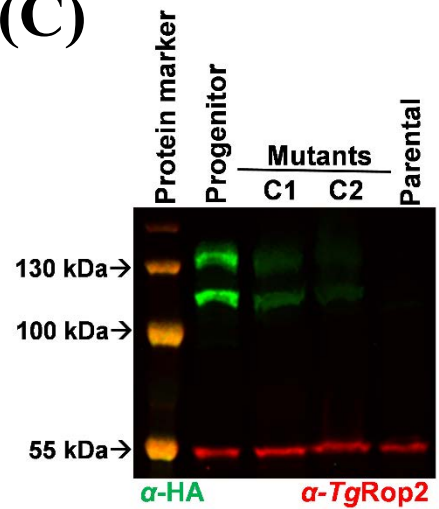

# Figure S6

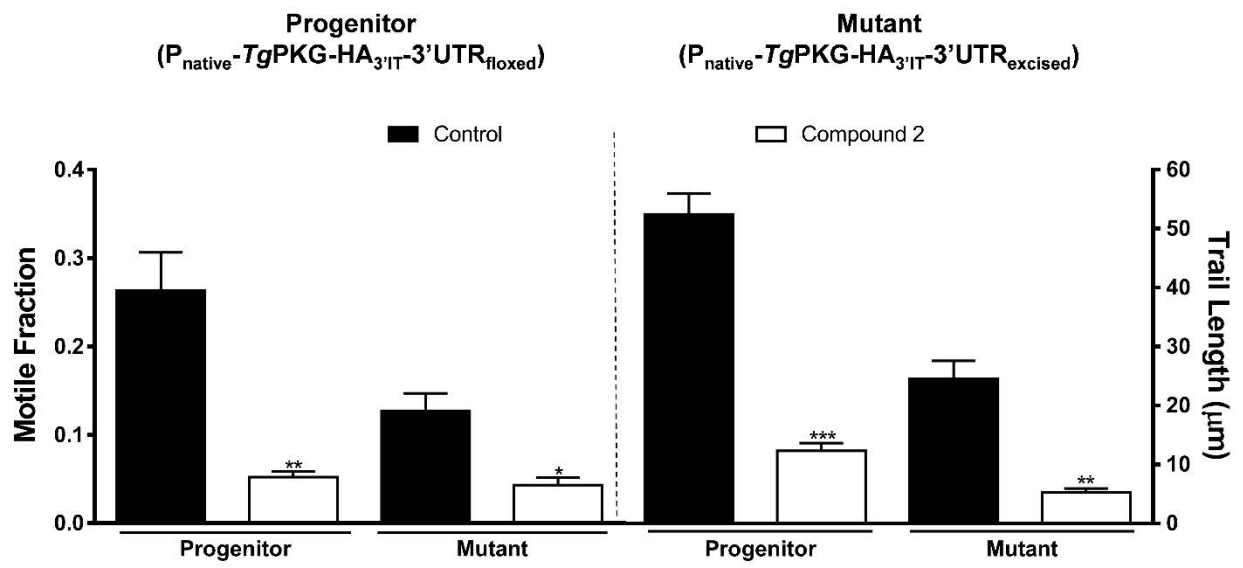

Supplement: Supplementary file [file media-1.pdf]
